# Supplementary material for: 2,4-Dichlorophenoxyacetic Thiosemicarbazides as a New Class of Compounds against Stomach Cancer Potentially Intercalating with DNA
Source: PubMed Central journal article supplement (PMC7072506; doi:10.3390/biom10020296), 2020-02-13
Supplement: biomolecules-10-00296-s001.pdf [file biomolecules-10-00296-s001.pdf]

# 2,4-Dichlorophenoxyacetic Thiosemicarbazides as a New Class of Compounds Against Stomach Cancer Potentially Intercalating with DNA

Monika Pitucha<sup>1\*</sup>, Agnieszka Korga-Plewko<sup>2</sup>, Pawel Kozyra<sup>3</sup>, Magdalena Iwan<sup>2</sup> and Agnieszka A. Kaczor<sup>4,5</sup>

<sup>1</sup>Independent Radiopharmacy Unit, Department of Organic Chemistry, Faculty of Pharmacy, Medical University of Lublin, Poland; monika.pitucha@umlub.pl

<sup>2</sup>Independent Medical Biology Unit, Medical University of Lublin; agnieszkakorga@umlub.pl

<sup>3</sup>Student research group, Independent Radiopharmacy Unit, Medical University of Lublin,

<sup>4</sup>Department of Synthesis and Chemical Technology of Pharmaceutical Substances, Faculty of Pharmacy, Medical University of Lublin, e-mail: agnieszka.kaczor@umlub.pl

<sup>5</sup>School of Pharmacy, University of Eastern Finland, Yliopistonranta 1, P.O. Box 1627, FI-70211 Kuopio, Finland;

Compound 1

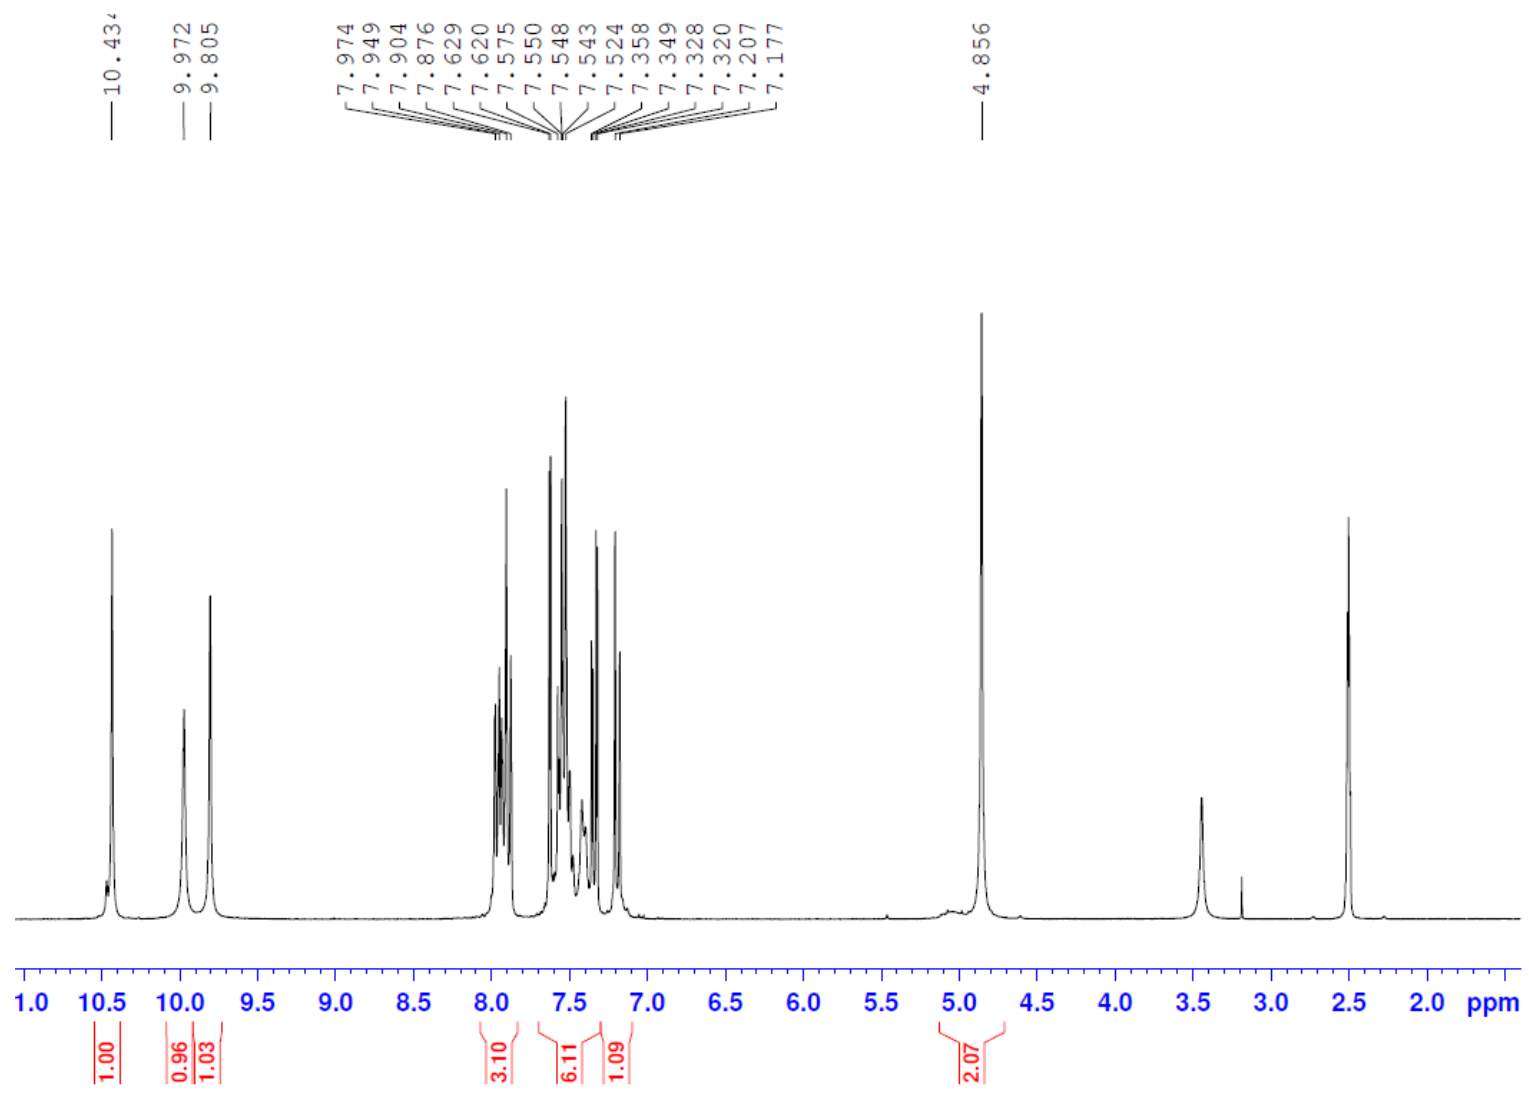

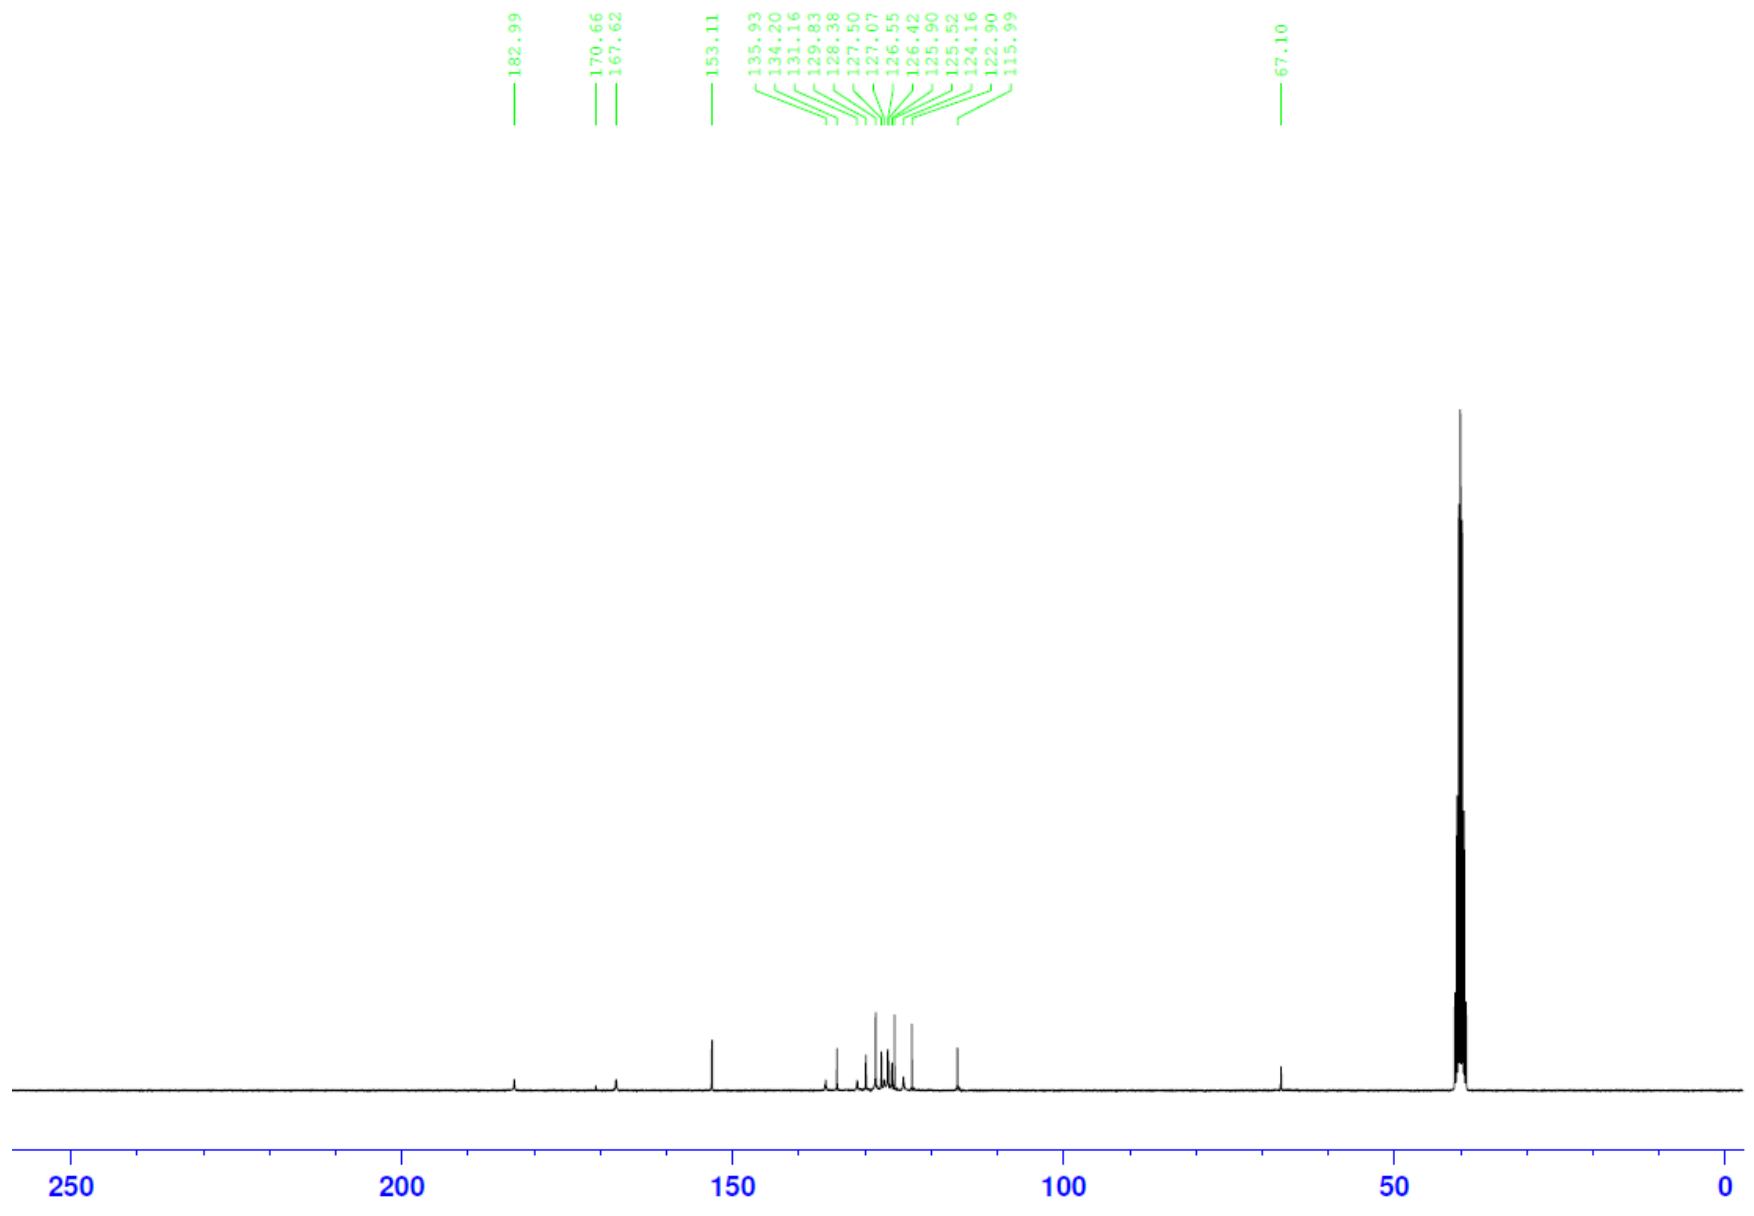

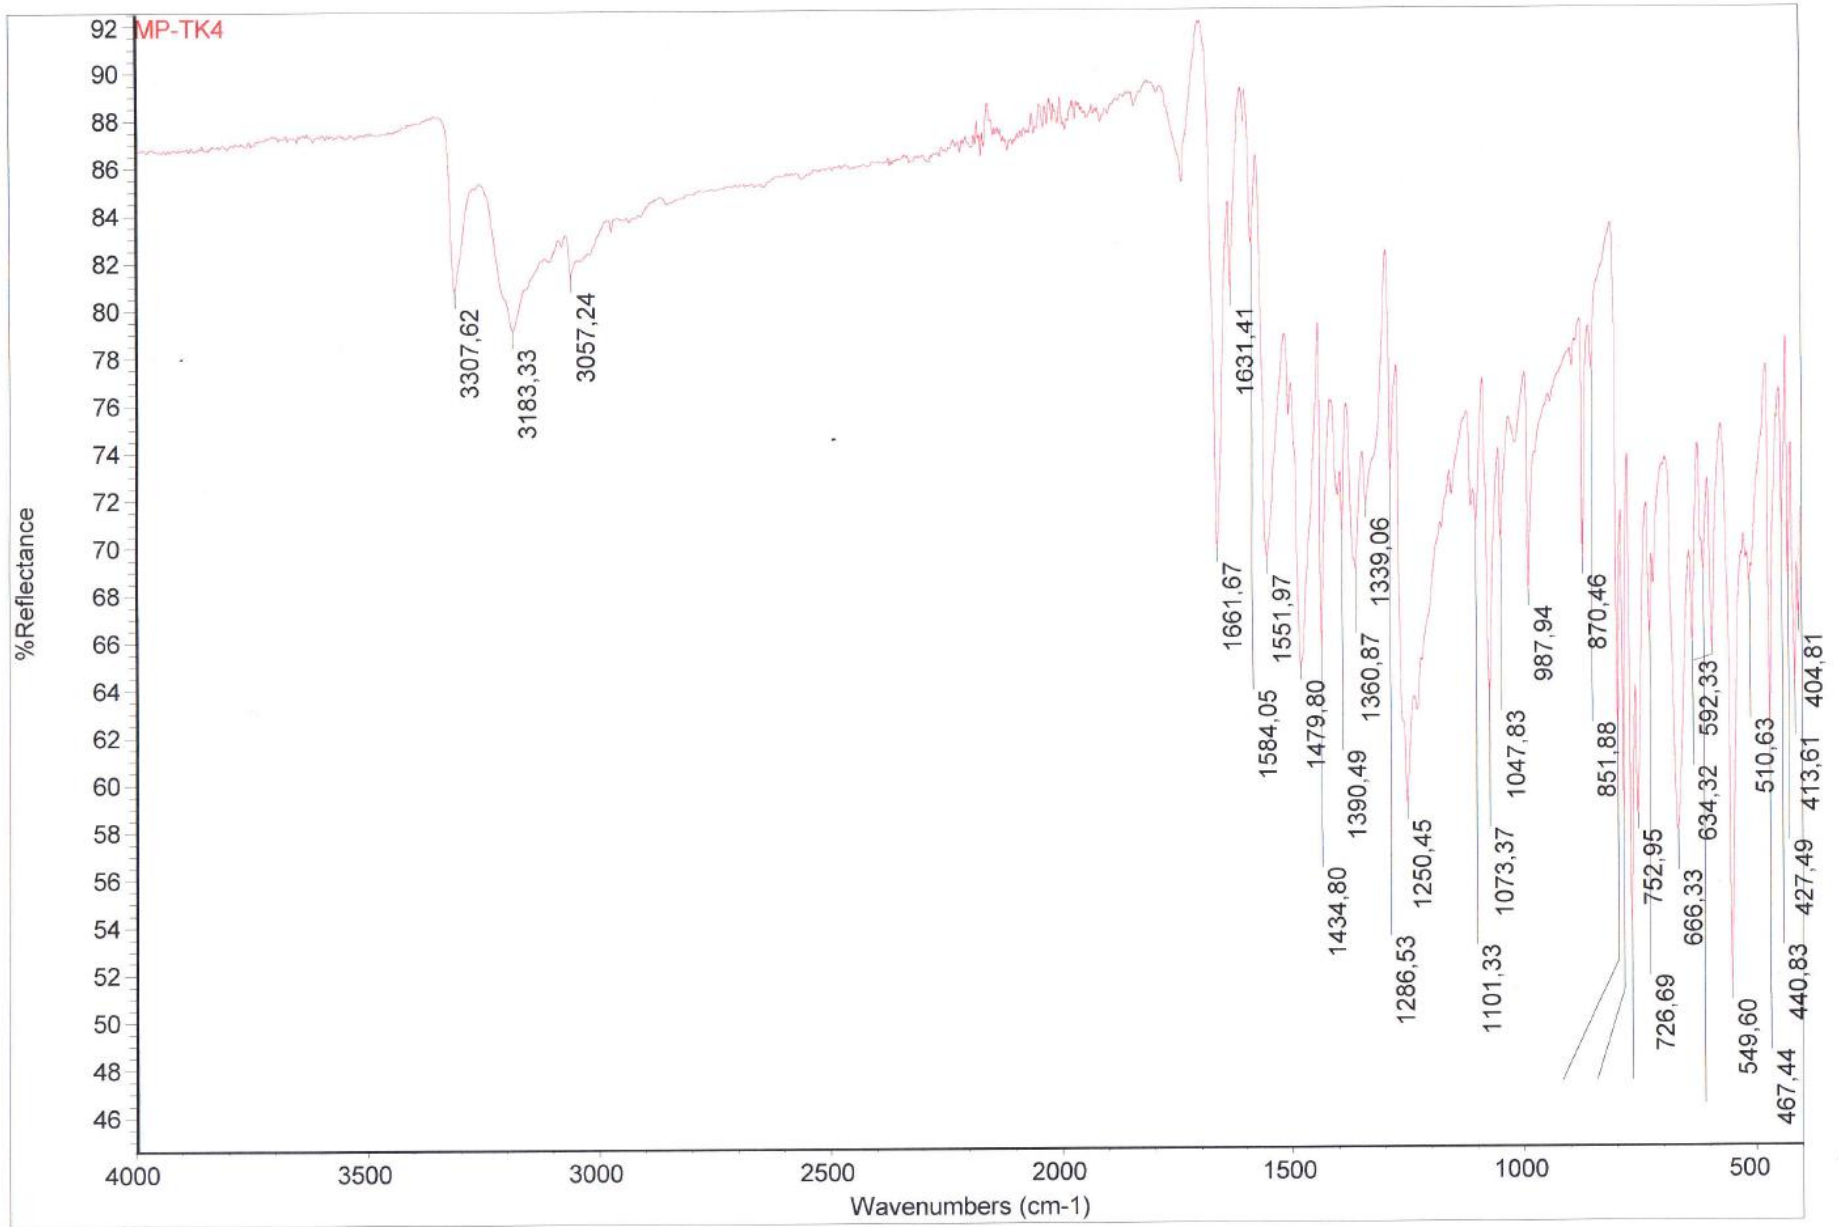

Compound 2

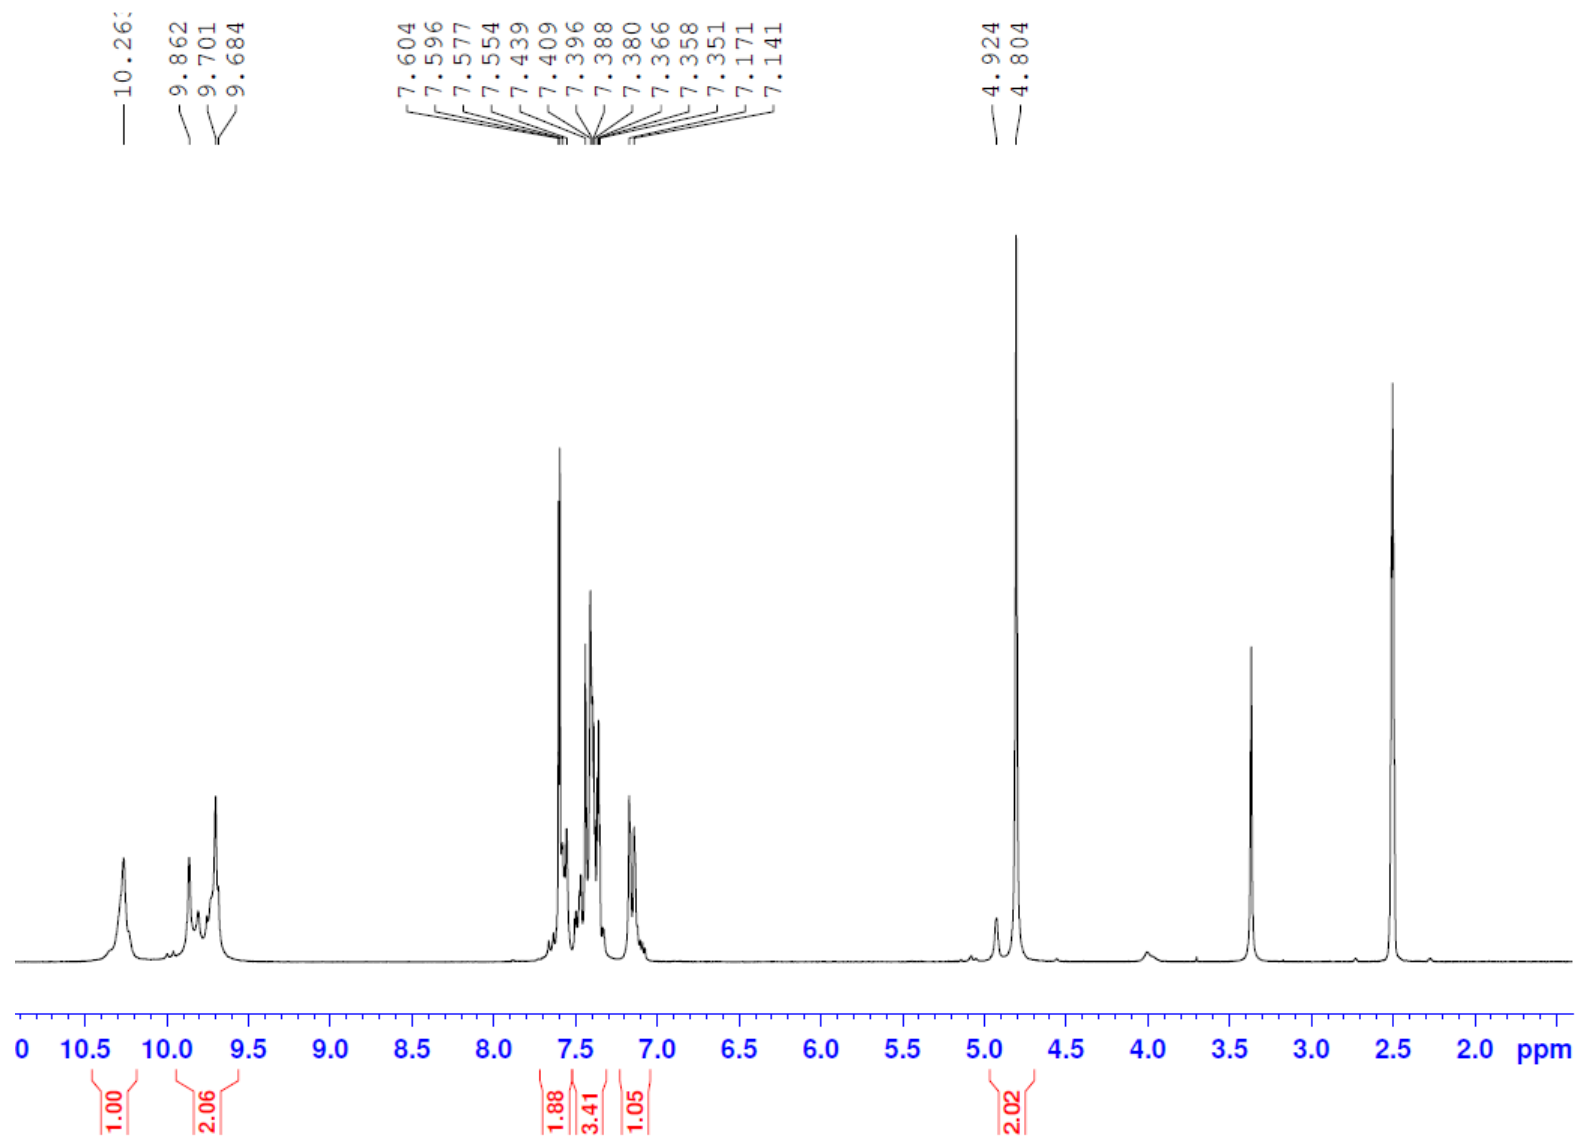

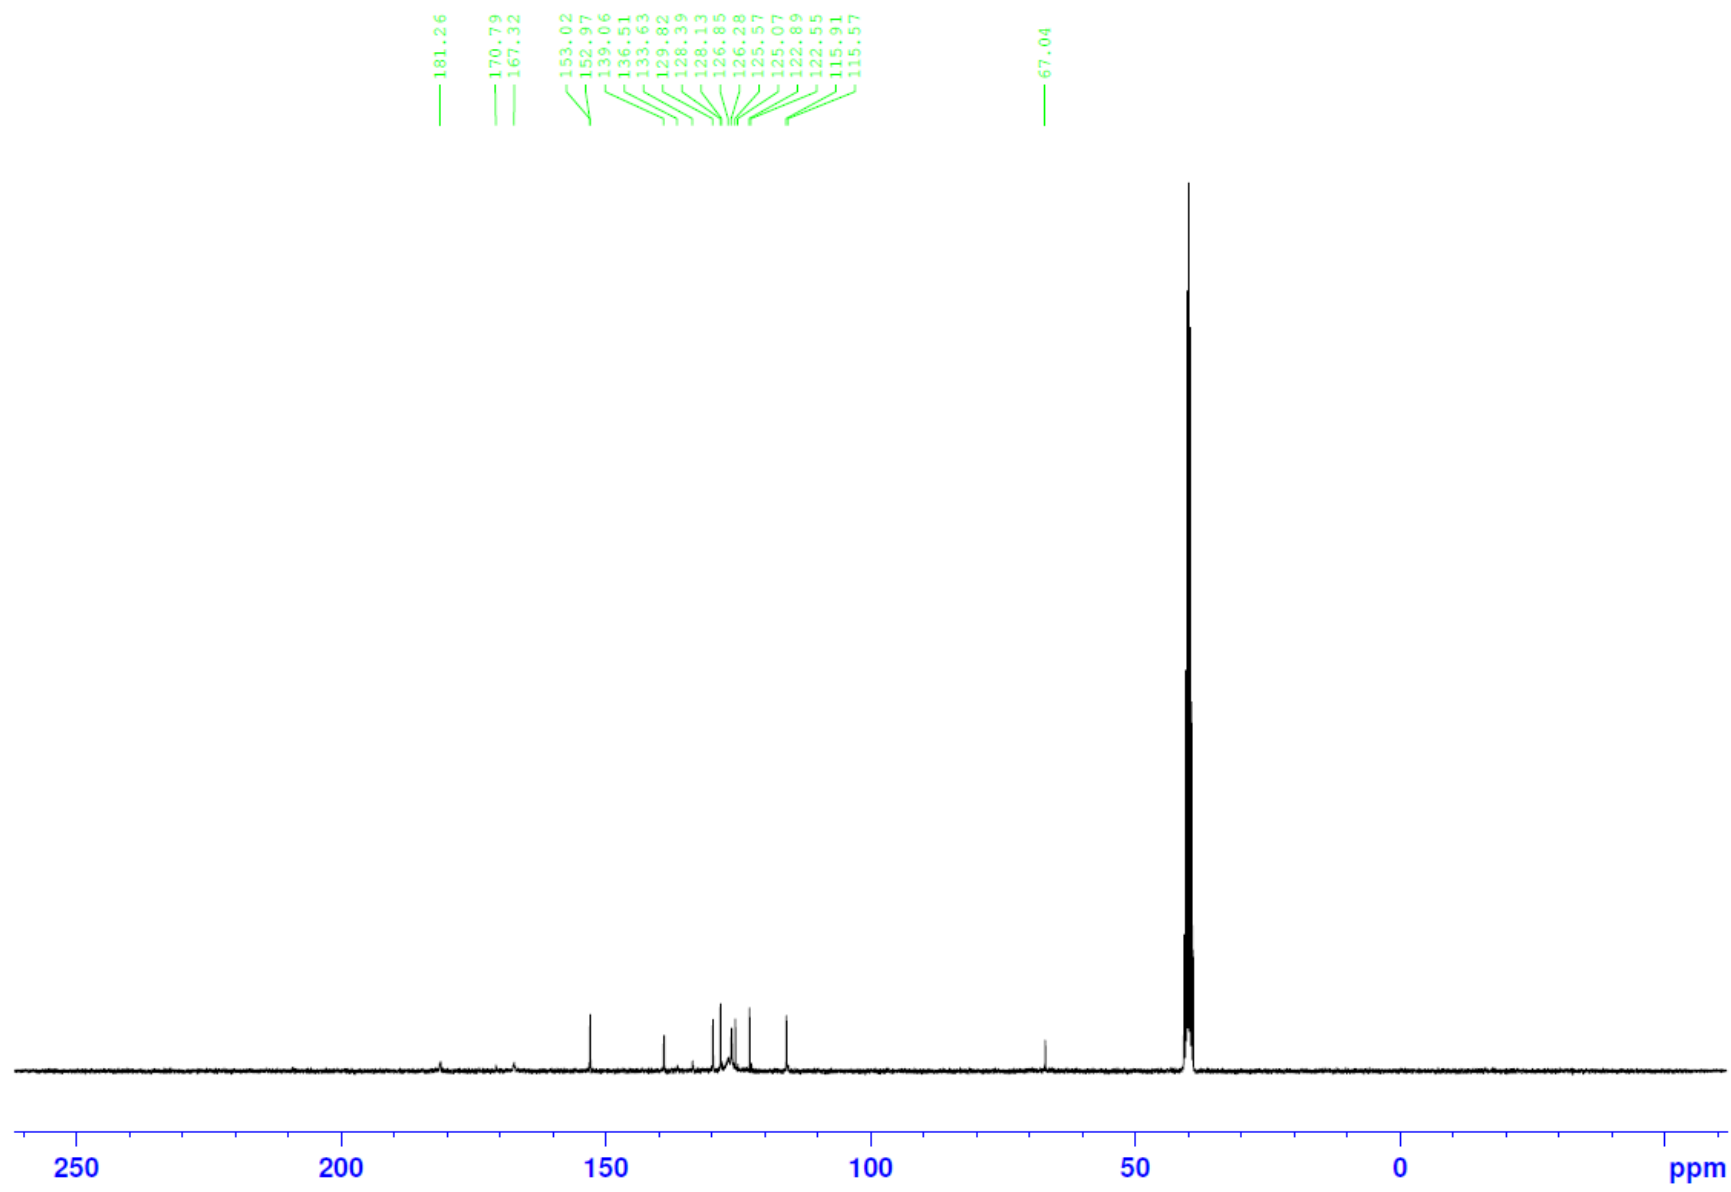

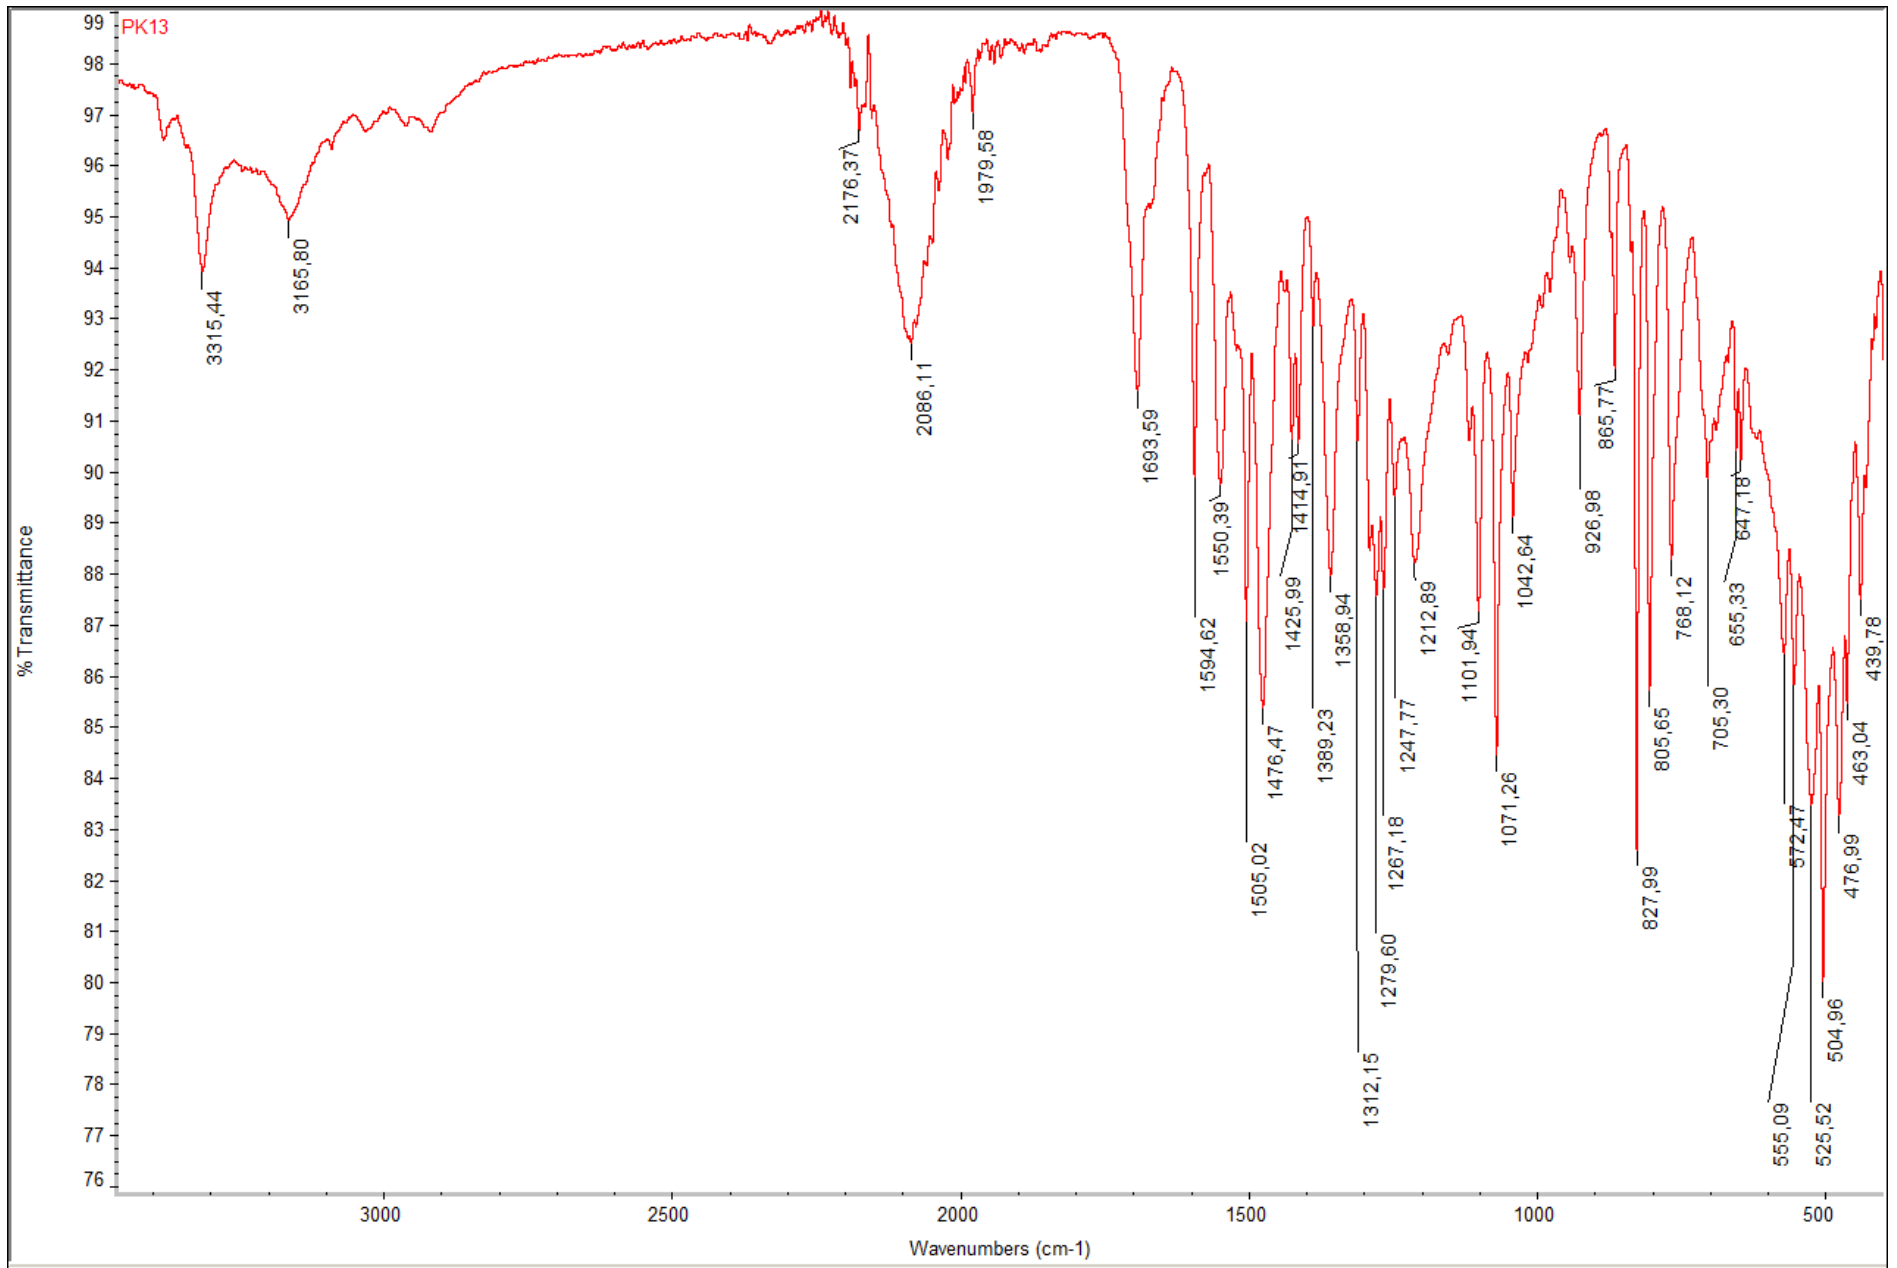

## Compound 1

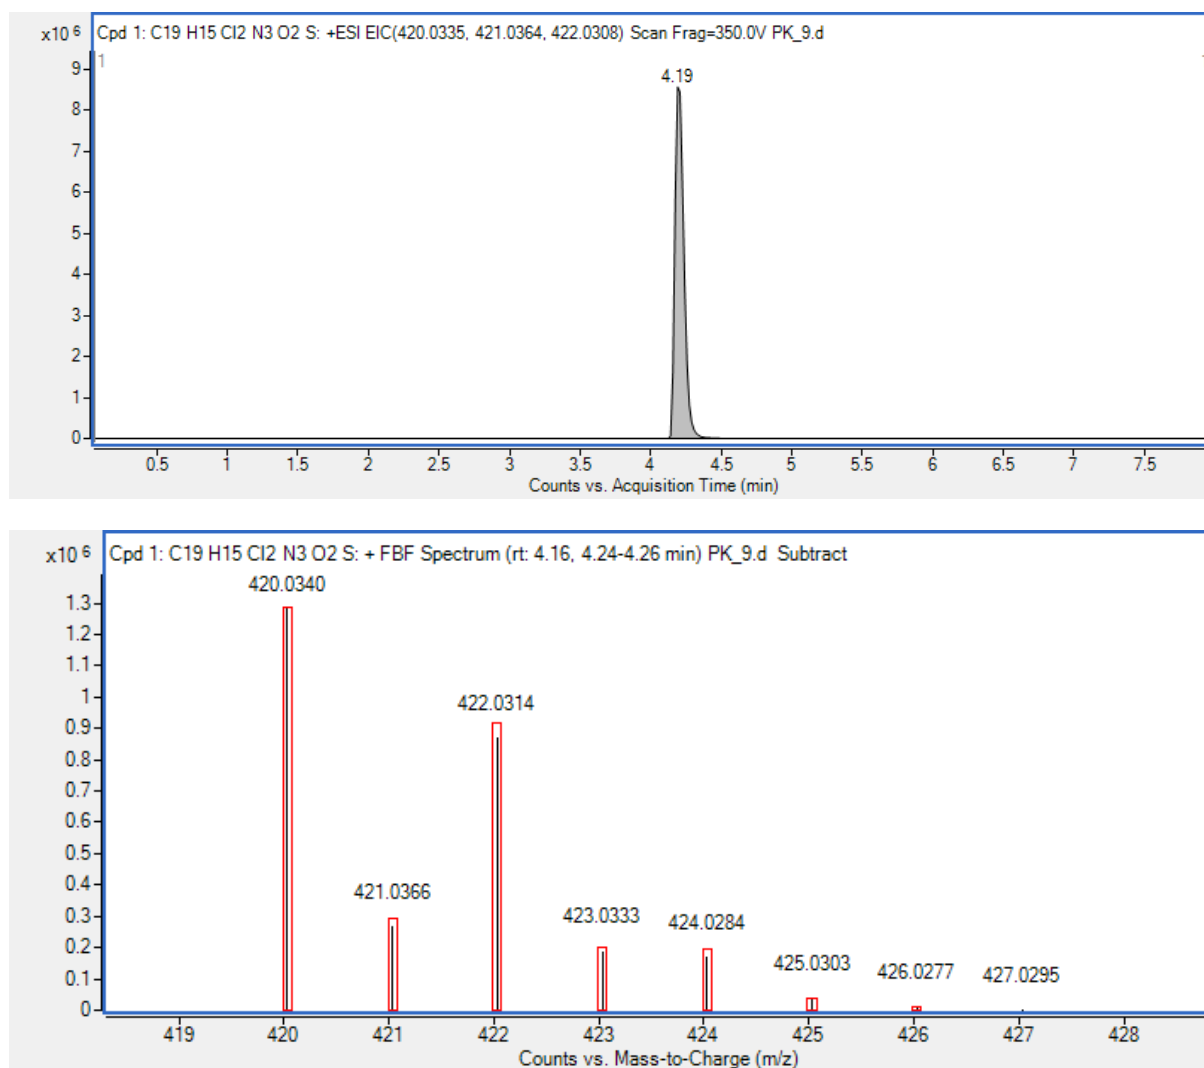

Figure S1. LC/QTOF MS EIC chromatogram (top) and MS spectrum (bottom) of compound 1. Calculated monoisotopic mass: 419.0262, Measured monoisotopic mass: 419.0266, Isotopic pattern match: 99.05%, Mass error: 0.98 ppm.



## Compound 2

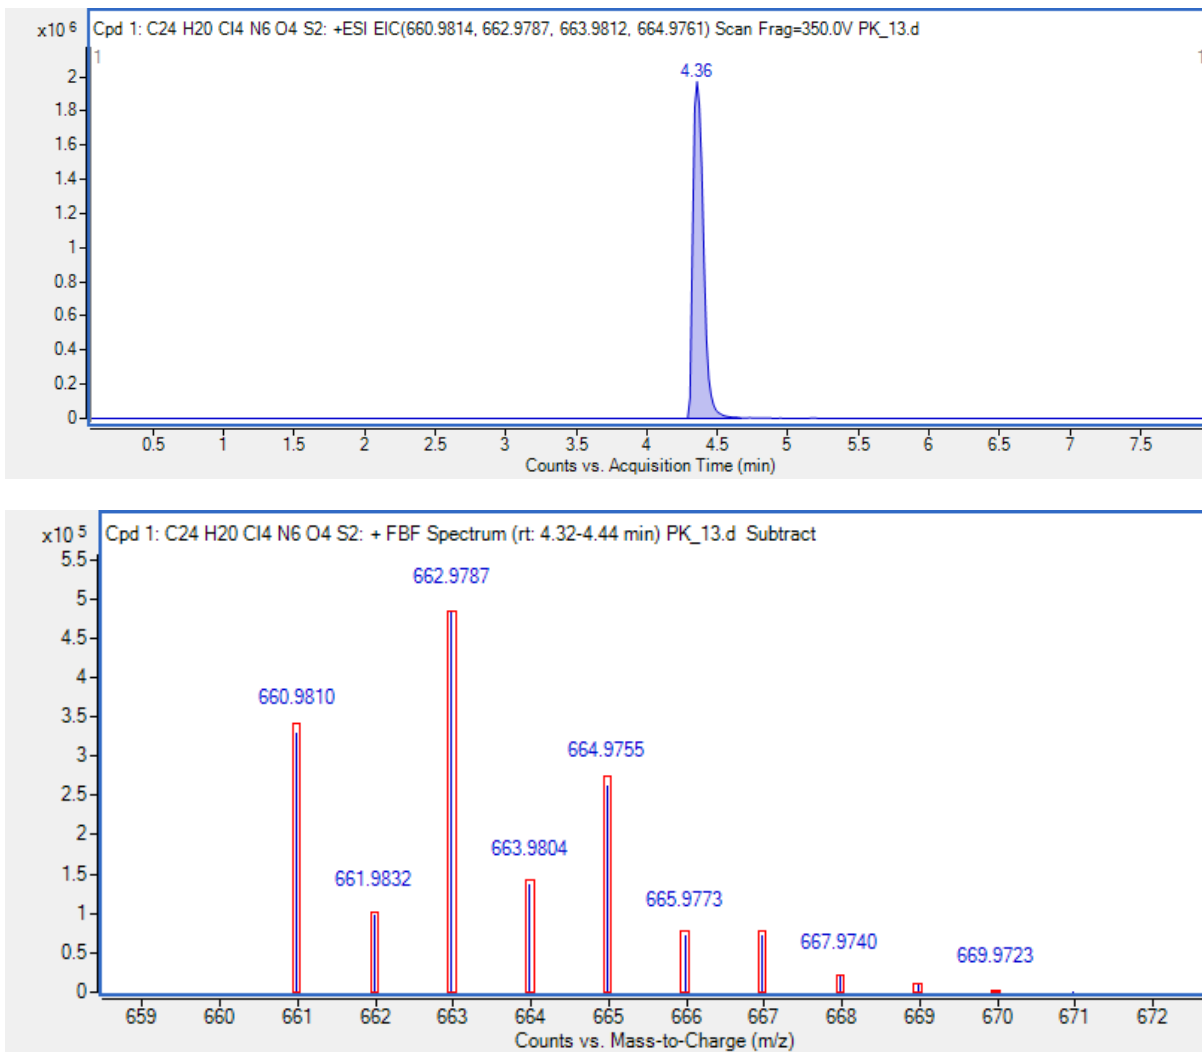

Figure S2. LC/QTOF MS EIC chromatogram (top) and MS spectrum (bottom) of compound 2. Calculated monoisotopic mass: 659.9742 , Measured monoisotopic mass: 659.9736, Isotopic pattern match: 99.33%, Mass error: -0.78 ppm.
